# Supplementary material for: A Systems Biology Strategy Reveals Biological Pathways and Plasma Biomarker Candidates for Potentially Toxic Statin-Induced Changes in Muscle
Source: PLoS One. 2006 Dec 20;1(1):e97. doi: 10.1371/journal.pone.0000097 (PMC1762369; doi:10.1371/journal.pone.0000097)
Supplement: Dataset S1 — Clinical background data for the subjects included in the study. (0.02 MB XLS) [file pone.0000097.s039.xls]

## Sheet: Clinical data
	Group1=Placebo
	Group2=Simvastatin (80mg)
	Group3=Atorvastatin (40mg)
CASE	GROUP	GENDER	AGE	BMI	P_CHOL1	P_CHOL2	P_LDL1	P_LDL2	P_TRIGL1	P_TRIGL2	P_HDL1	P_HDL2
10	1	1	62	26.1738	6.5	6.95	3.82091	3.58182	3.43	4.77	1.12	1.2
15	1	1	45	22.46	5.6	5.44	2.96727	2.99545	1.59	1.66	1.91	1.69
18	1	1	69	25.8264	5.58	5.66	3.85727	3.98091	1.92	1.45	0.85	1.02
22	1	1	64	32	5.6	5.51	3.71091	3.74818	2.11	1.72	0.93	0.98
25	1	1	60	22.0522	4.41	4.82	2.28636	2.89455	2.67	2.08	0.91	0.98
28	1	0	53	28.9341	5.92	6.54	3.85727	4.34636	1.26	1.24	1.49	1.63
31	1	0	63	24.4473	7.25	6.01	4.89091	4.49818	2.11	1.06	1.4	1.03
32	1	0	64	20.4444	5.29	5.2	2.38364	2.51	3.38	3.3	1.37	1.19
33	1	1	45	25.3815	6.96	5.16	4.67091	3.37818	0.9	1.17	1.88	1.25
38	1	0	63	23.7118	5.44	5.21	3.76636	3.39545	1.13	1.55	1.16	1.11
42	1	1	58	23.5102	5.02	6.76	3.20091	4.50727	1.67	1.37	1.06	1.63
3	2	0	60	28.8415	6.12	3.24	3.89545	1.46545	1.77	1	1.42	1.32
12	2	0	49	26.041	4.9		2.50909		1.85		1.55
14	2	1	59	30.3461	5.7	2.88	3.56545	1.37818	2.54	0.95	0.98	1.07
17	2	0	62	27.1706	5.07	2.93	3.46364	1.45818	1.4	0.95	0.97	1.04
21	2	1	56	31.7083	5.5	4.39	3.12545	1.61	1.77	1.65	1.57	2.03
23	2	0	46	34.4022	4.13	3.3	2.47	1.54909	1.87	1.85	0.81	0.91
27	2	1	62	34.5473	7.67	4.97	5.57091	2.77909	2.11	1.96	1.14	1.3
30	2	1	67	27.0416	5.09	2.97	3.12273	1.07727	2.26	2.25	0.94	0.87
36	2	0	58	29.9616	4.43	3.55	2.51545	1.79182	1.11	0.92	1.41	1.34
37	2	1	50	28.578	5.45	3.95	3.47273	2.14909	2.04	1.08	1.05	1.31
41	2	1	54	26.3329	5.93	3.38	4.35818	1.87636	0.84	0.58	1.19	1.24
43	2	1	64	27.4529	7.16	3.93	3.97909	2.06909	4.49	1.85	1.14	1.02
46	2	0	68	23.9869	6.37	4.88	4.60273	2.82727	1.38	1.59	1.14	1.33
4	3	1	60	21.5645	4.36	2.77	3.11091	1.43909	0.79	0.53	0.89	1.09
11	3	1	45	27.4529	5.28	3	3.37182	1.25545	1.36	1.11	1.29	1.24
13	3	0	59	33.6327	7.06	4.57	4.48091	2.12455	1.34	1.31	1.97	1.85
16	3	1	61	26.9274	5.18	4.77	2.71	2.63818	3.52	2.6	0.87	0.95
19	3	0	46	27.1809	5.79	3	4.21909	1.67909	0.97	0.64	1.13	1.03
20	3	1	50	23.9912	6.52	4.56	3.80273	2.07	3.03	1.87	1.34	1.64
24	3	1	57	27.4587	5.51	3.15	3.82455	1.52545	0.76	0.67	1.34	1.32
26	3	1	53	40.3117	5.8	4.03	3.85273	2.37182	2.04	1.25	1.02	1.09
29	3	1	56	#NULL!	5.43	3.48	3.5	1.95	1.87	0.99	1.08	1.08
34	3	1	50	25.763	6.3	4.27	3.94818	2.27	2.49	1.32	1.22	1.4
35	3	1	57	25.2801	5.68	4.51	3.59	2.63636	2.64	1.9	0.89	1.01
39	3	0	63	23.9995	7.77	4.55	4.35636	1.64455	2.89	1.64	2.1	2.16
40	3	1	62	24.281	5.37	2.95	3.64545	1.38364	0.78	0.96	1.37	1.13
44	3	1	64	22.9926	5.62	3.33	3.66	1.51909	1.87	0.97	1.11	1.37
