# Supplementary material for: A Systems Biology Strategy Reveals Biological Pathways and Plasma Biomarker Candidates for Potentially Toxic Statin-Induced Changes in Muscle
Source: PLoS One. 2006 Dec 20;1(1):e97. doi: 10.1371/journal.pone.0000097 (PMC1762369; doi:10.1371/journal.pone.0000097)
Supplement: Dataset S3 — Lipidomics data. (0.20 MB XLS) [file pone.0000097.s041.xls]

## Sheet: Lipidomics data
	Group1=Placebo
	Group2=Simvastatin (80mg)
	Group3=Atorvastatin (40mg)
ID (X_1=0 weeks, X_5=8 weeks)	10_1	15_1	18_1	22_1	25_1	28_1	31_1	32_1	33_1	38_1	42_1	10_5	15_5	18_5	22_5	25_5	28_5	31_5	32_5	33_5	38_5	42_5	3_1	12_1	14_1	17_1	21_1	23_1	27_1	30_1	36_1	37_1	41_1	43_1	46_1	12_5	14_5	17_5	21_5	23_5	27_5	30_5	36_5	37_5	41_5	43_5	46_5	4_1	11_1
Group	1	1	1	1	1	1	1	1	1	1	1	1	1	1	1	1	1	1	1	1	1	1	2	2	2	2	2	2	2	2	2	2	2	2	2	2	2	2	2	2	2	2	2	2	2	2	2	3	3
GPCho(0:0/16:0)	0.0545633	0.0539549	0.0486413	0.0324297	0.0450293	0.0520008	0.0484311	0.0366818	0.0624906	0.0552036	0.0468988	0.0664905	0.0547145	0.0398386	0.0362071	0.0312512	0.0265403	0.0653768	0.0270837	0.0390523	0.0397843	0.0442819	0.0371151	0.0535656	0.0489433	0.0345843	0.0386315	0.0249486	0.0160483	0.0261535	0.0419895	0.0173463	0.0586232	0.0297405	0.0239244	0.0407029	0.0309061	0.0349716	0.0404334	0.025013	0.0325154	0.026296	0.026292	0.0300598	0.0379243	0.0345296	0.0291935	0.027349	0.0336343
GPCho(16:0/0:0)	0.722989	0.694379	0.60069	0.381562	0.516191	0.651882	0.55672	0.510994	0.676214	0.611578	0.558373	0.850416	0.685754	0.480965	0.517401	0.363458	0.466443	0.860152	0.551492	0.477127	0.45339	0.871448	0.515999	0.696713	0.52047	0.419065	0.50068	0.315397	0.335009	0.252396	0.498089	0.246379	0.698268	0.324519	0.447252	0.434555	0.477095	0.414614	0.555692	0.644804	0.389805	0.315506	0.58499	0.352833	0.565181	0.479002	0.370165	0.261774	0.636463
GPCho(O-16:2)	0.0453788	0.0386793	0.0363301	0.0234086	0.0367885	0.0410306	0.035808	0.0282399	0.0472173	0.0483762	0.0373335	0.054105	0.047488	0.0286125	0.029746	0.025713	0.031257	0.0532954	0.0361774	0.0298858	0.0285805	0.0630656	0.0328207	0.0426683	0.0420831	0.0264246	0.034743	0.0240237	0.0206388	0.0167069	0.0300451	0.0132806	0.0558125	0.0189857	0.0270446	0.0280154	0.0291478	0.030082	0.0318385	0.0393389	0.0261197	0.0213279	0.0377949	0.0226935	0.0356335	0.0323322	0.0254329	0.0165358	0.0431843
GPCho(0:0/18:0)	0.0158154	0.0142165	0.0156521	0.0148397	0.0183348	0.0258735	0.0230819	0.0121355	0.0268306	0.0215064	0.0205773	0.0230942	0.0182296	0.0152075	0.0187957	0.0149389	0.011422	0.025075	0.0085053	0.0184457	0.0163127	0.0143113	0.0231173	0.0241659	0.0220617	0.0181593	0.0138021	0.0140555	0.0133368	0.0095234	0.0178721	0.00850488	0.0196179	0.01154	0.0109958	0.0125063	0.0112344	0.014505	0.017666	0.0164764	0.0235057	0.0142279	0.0148728	0.0162815	0.0132795	0.0159635	0.0151551	0.010605	0.0129082
GPCho(18:0/0:0)	0.154669	0.120877	0.137589	0.113906	0.145071	0.22143	0.211963	0.10665	0.23796	0.170836	0.165908	0.203845	0.162501	0.10419	0.141171	0.131373	0.161978	0.199255	0.12835	0.146677	0.13489	0.198971	0.193614	0.204647	0.197988	0.137	0.121559	0.132162	0.113598	0.0690094	0.169863	0.0764399	0.190327	0.0837913	0.152879	0.115731	0.179235	0.142288	0.157396	0.266025	0.126159	0.118241	0.215809	0.124532	0.158503	0.147682	0.123612	0.0979843	0.188345
GPCho(0:0/18:1)	0.0276151	0.0463171	0.0271846	0.021399	0.0209976	0.026336	0.0296767	0.0235101	0.0415186	0.0304217	0.0257424	0.0353282	0.0410644	0.0220158	0.021019	0.0214079	0.0162742	0.0431471	0.0153207	0.0262818	0.0192816	0.0283015	0.0231173	0.0294523	0.02659	0.0240499	0.0252994	0.0194694	0.0183435	0.0210553	0.0262924	0.0146336	0.0341921	0.0225248	0.0208347	0.0305529	0.00953702	0.0268223	0.0283327	0.0142576	0.0298478	0.0276574	0.0188923	0.0259386	0.0209916	0.0227451	0.0239371	0.0144389	0.0154794
GPCho(18:1/0:0)	0.125967	0.220147	0.0910636	0.0707587	0.079301	0.120501	0.138349	0.0704528	0.179471	0.112233	0.111868	0.203845	0.177065	0.0832418	0.0847081	0.0744146	0.0990678	0.183364	0.0958911	0.0951762	0.0749918	0.315462	0.0808615	0.144091	0.119374	0.0761738	0.11044	0.0554914	0.0627734	0.0625524	0.0939487	0.0445403	0.141449	0.0691867	0.0820085	0.124159	0.148661	0.118781	0.111374	0.116203	0.0978374	0.102383	0.128587	0.104076	0.139675	0.0943616	0.108751	0.0451957	0.119987
GPCho(0:0/18:2)	0.0226208	0.0152578	0.0124551	0.011288	0.0175858	0.0254111	0.0241058	0.0137339	0.0312609	0.0312832	0.0202604	0.038241	0.0134861	0.0162694	0.0152388	0.0162139	0.00904039	0.0341289	0.00653983	0.0176765	0.0160158	0.0156717	0.0164041	0.030627	0.0292631	0.011993	0.014766	0.018563	0.00928657	0.0124429	0.0158058	0.00668067	0.0206164	0.0128398	0.0117378	0.0259437	0.0116721	0.0160069	0.017666	0.0110816	0.0121142	0.013792	0.00777875	0.021071	0.00867464	0.0183234	0.0158774	0.00972463	0.0159116
GPCho(18:2/0:0)	0.149405	0.111558	0.0811057	0.0719513	0.128166	0.163971	0.162882	0.0767503	0.259782	0.218787	0.134143	0.391568	0.105913	0.0955606	0.0872385	0.112225	0.104082	0.242702	0.0898612	0.110076	0.0950862	0.254872	0.0997127	0.315431	0.246235	0.0795064	0.12446	0.0797885	0.0471159	0.0734487	0.0971883	0.0625092	0.141449	0.0711318	0.076417	0.198105	0.198282	0.123239	0.141594	0.154424	0.0726438	0.119446	0.139225	0.139631	0.111601	0.131447	0.10386	0.0504687	0.188298
GPCho(18:3/0:0)	0.0736606	0.0854634	0.0824046	0.0691686	0.0820674	0.108803	0.0782915	0.0645489	0.0841712	0.0998233	0.0691883	0.0619274	0.08176	0.067988	0.0607954	0.0685397	0.049259	0.0973334	0.057969	0.073868	0.0680553	0.0477921	0.0837494	0.0634244	0.0866969	0.0690325	0.0700117	0.0639684	0.0592379	0.0581131	0.0894132	0.0386907	0.0823136	0.0691867	0.0694276	0.066116	0.00960221	0.0616423	0.0813799	0.0546208	0.0801218	0.0647262	0.055077	0.072429	0.0483599	0.0688454	0.0680344	0.049414	0.0465062
GPCho(0:0/20:3)	0.0193649	0.0162991	0.00991488	0.013871	0.0112472	0.0149441	0.0124429	0.00928806	0.0169053	0.0173578	0.0161416	0.0420277	0.013851	0.00889645	0.0101323	0.0108033	0.00904039	0.00931588	0.00950711	0.0142151	0.0104619	0.0227514	0.0128913	0.0176902	0.0150227	0.00820201	0.0144447	0.00916827	0.00661028	0.00855935	0.014258	0.00511706	0.0162939	0.0067882	0.0047233	0.0181368	0.0136417	0.0124312	0.0159819	0.0182337	0.0105766	0.0142279	0.0143766	0.0119383	0.0154186	0.0106494	0.00907709	0.00368051	0.014615
GPCho(20:3/0:0)	0.0324914	0.0251632	0.0275364	0.024081	0.02598	0.0395347	0.0527591	0.0156521	0.0491169	0.0330061	0.0335757	0.0521494	0.024555	0.0202096	0.0323892	0.028801	0.03807	0.039281	0.0248792	0.0270826	0.0282604	0.0521123	0.0435674	0.0447241	0.0453115	0.0308535	0.0287336	0.0221886	0.0165073	0.0127707	0.0268229	0.0132806	0.0460339	0.0132731	0.0534204	0.0238855	0.020725	0.0320378	0.0318385	0.054027	0.0193232	0.0208832	0.0493896	0.0271627	0.0381788	0.0286699	0.0295696	0.015633	0.0442064
GPCho(20:4/0:0)	0.037716	0.036388	0.0185776	0.0230724	0.02598	0.0375751	0.0210553	0.0275364	0.0453177	0.0356317	0.043141	0.0850903	0.0330349	0.0159154	0.0196294	0.0224008	0.0307329	0.025075	0.0268082	0.0314876	0.0163127	0.0690059	0.0195317	0.030627	0.0461186	0.0189327	0.0266374	0.0136112	0.0061696	0.0217243	0.0257661	0.0100907	0.0331156	0.0137063	0.0143667	0.0276589	0.0447137	0.0343197	0.0340303	0.0350942	0.0193232	0.0249346	0.0457977	0.0300598	0.0381788	0.0275969	0.0390579	0.0129643	0.0472728
GPCho(20:4/0:0)	0.021632	0.0428801	0.0150127	0.0122566	0.013092	0.0240237	0.0247884	0.0127748	0.0380994	0.0173578	0.0196268	0.0479122	0.0406629	0.0120215	0.0144216	0.0120758	0.0182579	0.0350435	0.0173751	0.0145997	0.0130803	0.0559372	0.0132765	0.0318018	0.0213131	0.0123721	0.0193256	0.00961256	0.0128868	0.0134263	0.0168376	0.00746248	0.0260217	0.009807	0.0158806	0.0225134	0.0155943	0.0211703	0.018508	0.0192379	0.0141643	0.0168809	0.0230818	0.018269	0.0310002	0.0156307	0.0232	0.00885728	0.0238147
GPCho(22:6/0:0)	0.0196879	0.0162991	0.0159717	0.0148397	0.0112472	0.0144998	0.0153931	0.0156521	0.0183034	0.0169442	0.0142698	0.0350369	0.0145807	0.0116727	0.00696991	0.012712	0.0121384	0.0136217	0.0102585	0.0119282	0.0136622	0.0156717	0.0152313	0.0112	0.0231845	0.0123721	0.0170307	0.00783538	0.00883654	0.0104875	0.0189246	0.00280711	0.0209492	0.01154	0.0109958	0.0108639	0.0121827	0.01332	0.018087	0.00818826	0.0167271	0.00943233	0.0246869	0.00765175	0.0223564	0.00967042	0.0144327	0.00827905	0.01312
Cer(d18:1/22:0)	0.0152125	0.00831374	0.0104409	0.00944135	0.00706181	0.0114747	0.0189961	0.00971529	0.0163638	0.0113239	0.0111511	0.0219066	0.00932351	0.00767056	0.014017	0.00654129	0.00891944	0.011216	0.0136473	0.0101175	0.00991011	0.0197721	0.0117596	0.0134885	0.0121435	0.00926371	0.0095602	0.0155496	0.00701455	0.00972918	0.00560295	0.00682054	0.0204949	0.00919512	0.0168947	0.00822445	0.010873	0.0123176	0.00841261	0.0245727	0.00783543	0.00689659	0.00529288	0.00819803	0.0110184	0.00882678	0.00996035	0.00711664	0.0118613
DG(36:2)	0.165153	0.0458605	0.0853506	0.114543	0.103718	0.0914298	0.166185	0.128553	0.0491152	0.0541459	0.0951093	0.270074	0.1016	0.053553	0.0974497	0.0815716	0.0542239	0.107842	0.061123	0.0366257	0.0613221	0.0728944	0.0798651	0.116128	0.0911688	0.0663935	0.11248	0.080315	0.0613221	0.0634274	0.0769293	0.0358255	0.165153	0.0574753	0.0439581	0.0573105	0.0598855	0.0815716	0.098851	0.103449	0.119439	0.0577242	0.090044	0.0458897	0.0928778	0.0657407	0.0784881	0.0355273	0.0663688
DG(44:12)	0.366909	0.319789	0.368088	0.235825	0.31766	0.311318	1.09284	0.390581	0.513264	0.697154	0.276815	0.59954	0.554864	0.506491	0.345421	0.236357	0.309963	0.318947	0.576158	0.238411	0.561531	0.506224	0.568573	0.429437	0.436951	0.383229	0.236346	0.253148	0.140951	0.227468	0.172083	0.188229	0.563401	0.377406	0.635448	0.238018	0.593094	0.479126	0.363809	0.428328	0.192843	0.135229	0.351651	0.243488	0.250176	0.306804	0.288077	0.183337	0.493393
GPCho(32:0)	0.0572345	0.0719674	0.0771362	0.0541781	0.0673548	0.0681463	0.0571028	0.0770656	0.0813562	0.070171	0.061897	0.0572495	0.0635661	0.0681699	0.0486789	0.0471885	0.0466919	0.0686957	0.0679335	0.0648861	0.0723662	0.0766206	0.05627	0.0505717	0.0702452	0.0594336	0.0613436	0.0821732	0.0555835	0.0773545	0.0647158	0.0357388	0.069869	0.0633851	0.0981127	0.0413351	0.0608873	0.0505717	0.0603376	0.0539992	0.0552101	0.0502948	0.0490452	0.043366	0.0449177	0.0446876	0.0743066	0.0519963	0.0663482
GPCho(O-32:0)	0.0155206	0.0118078	0.020032	0.0136296	0.00836822	0.0177301	0.0149551	0.0140717	0.0163022	0.0151592	0.0119077	0.0159787	0.0139326	0.0218403	0.0146631	0.00830194	0.0154491	0.016842	0.0105859	0.0139355	0.0172358	0.0166025	0.0104806	0.0160518	0.0156963	0.0123115	0.0178187	0.0173953	0.00857185	0.0182999	0.0103127	0.00807032	0.0157737	0.0115686	0.0205157	0.0101515	0.0157029	0.0134981	0.0122711	0.0177566	0.00784998	0.0109982	0.0136944	0.0115502	0.0116267	0.00905471	0.0128576	0.0109309	0.0202701
GPCho(32:1)	0.101998	0.210542	0.162138	0.0669835	0.0685553	0.0757526	0.0981235	0.119673	0.116237	0.0963291	0.0633799	0.1051	0.22918	0.138057	0.0633859	0.0441807	0.0614851	0.0494037	0.0955858	0.072982	0.103977	0.220252	0.0869471	0.0863494	0.0546651	0.141695	0.0732617	0.0567465	0.070109	0.0852634	0.0840248	0.0429564	0.11208	0.110943	0.0974544	0.0579835	0.0577115	0.0997377	0.0711878	0.0906382	0.135318	0.0422613	0.051596	0.051378	0.106437	0.0567266	0.0721405	0.049894	0.073765
GPCho(O-32:1)	0.0136296	0.0149571	0.0164452	0.0129541	0.00936539	0.0159848	0.0135123	0.0111567	0.0146589	0.0110409	0.014328	0.0140243	0.0135542	0.015888	0.0135628	0.00724915	0.0126197	0.0152123	0.0101426	0.00788373	0.0120959	0.0172582	0.01123	0.0108957	0.0115578	0.0131064	0.0139097	0.0136976	0.00857185	0.0121118	0.010542	0.00573739	0.0119077	0.0106721	0.0153512	0.00922788	0.0106027	0.0104128	0.0105964	0.0148054	0.00993037	0.00842663	0.0102121	0.00760404	0.00720061	0.0100435	0.0122955	0.00838713	0.0163688
GPCho(34:1)	0.882127	1.26783	1.01694	0.720533	0.6959	0.874382	0.997967	0.861808	0.973442	0.746585	0.69962	0.958869	1.30221	0.946209	0.602244	0.51996	0.633682	0.93381	0.76077	0.692872	0.814426	1.40132	0.838524	0.798702	0.711003	0.778166	0.769606	0.719727	0.705187	0.862162	0.708163	0.515678	1.05021	0.791154	0.868299	0.652515	0.636962	0.897447	0.680417	0.78665	0.999879	0.66718	0.590526	0.592522	0.882064	0.652336	0.802072	0.459865	0.706771
GPCho(O-34:1)	0.033278	0.035315	0.0408542	0.033278	0.0213473	0.0403025	0.0458456	0.0346113	0.0416787	0.0307894	0.0297254	0.0444724	0.0413934	0.0329716	0.0358808	0.0220392	0.0364376	0.0413133	0.0279598	0.0292598	0.029332	0.0372341	0.0263158	0.0379098	0.0332289	0.0266329	0.0355885	0.0381334	0.0194208	0.0412906	0.0232903	0.0215692	0.0374096	0.023329	0.0395626	0.0282295	0.0407486	0.0352428	0.0233304	0.0445159	0.0267773	0.0270389	0.0275983	0.0238152	0.0287755	0.0233268	0.0323427	0.023448	0.0407868
GPCho(34:2)	1.1503	1.06079	1.05878	1.03001	1.1611	1.39346	1.50279	1.31105	1.31165	1.46898	1.06772	1.44581	1.10606	1.13838	0.984961	0.917408	0.98754	1.53986	0.982088	1.01253	1.05528	1.19956	1.12535	1.30684	1.28084	1.08674	1.03613	1.20871	1.0459	1.254	1.00228	0.756873	1.22541	1.05068	1.31134	1.11432	0.869189	1.11253	0.95729	1.28983	1.11179	0.999544	0.817438	0.820174	0.838802	1.07877	1.07924	0.770537	1.21585
GPCho(O-34:2)	0.022397	0.02848	0.024302	0.0191307	0.0187141	0.0335597	0.0340838	0.0251781	0.0257967	0.020337	0.0237252	0.0284297	0.0360234	0.0218403	0.0242723	0.0163373	0.0258552	0.0338018	0.0286588	0.0215642	0.0200135	0.0342994	0.0194482	0.024394	0.0236154	0.0232042	0.0226161	0.0332273	0.0182407	0.0259325	0.0183011	0.014054	0.0335675	0.0199013	0.026872	0.0196324	0.0210109	0.0280037	0.0199196	0.0355481	0.0194058	0.022075	0.0186272	0.0130168	0.0172786	0.0217277	0.0299506	0.0133709	0.0271625
GPCho(34:3)	0.116845	0.115208	0.0991	0.0760783	0.0878226	0.0798314	0.160759	0.134287	0.117361	0.0991	0.0925566	0.142716	0.128528	0.110421	0.0873752	0.0899458	0.0763389	0.0758682	0.102624	0.0702834	0.124582	0.11007	0.120601	0.118633	0.0941795	0.0870603	0.0584276	0.0704408	0.0369736	0.100077	0.0547851	0.0706818	0.0901612	0.136096	0.165991	0.0754602	0.0727401	0.109779	0.0514474	0.0997503	0.0761746	0.0466082	0.0745081	0.0677698	0.068154	0.0827591	0.114498	0.0507349	0.0832959
GPCho(O-34:3)	0.0350092	0.030928	0.0279029	0.0227408	0.0296857	0.0565689	0.0432803	0.0228946	0.0386141	0.0357889	0.0335675	0.0514925	0.0331147	0.0367945	0.0339461	0.0313538	0.0381789	0.0467123	0.0225331	0.0225509	0.029332	0.0486915	0.0323201	0.0491048	0.0336719	0.0292044	0.0296239	0.0401404	0.0253214	0.0271759	0.0227855	0.0202028	0.033163	0.0309189	0.0484899	0.0269294	0.033579	0.0337187	0.021324	0.0736783	0.022708	0.0309237	0.0209292	0.0247889	0.0178438	0.0308168	0.0403177	0.0184948	0.0544306
GPCho(36:0)	0.0353939	0.0658012	0.0421155	0.0305849	0.024858	0.0418428	0.0507444	0.0364696	0.0763818	0.0371924	0.0345785	0.0568383	0.0698559	0.0363166	0.0353532	0.0262496	0.0209506	0.0340365	0.0402388	0.0399639	0.0359366	0.0828618	0.044751	0.0472188	0.0396532	0.0400434	0.0312144	0.0443775	0.0267373	0.031794	0.0376757	0.0305786	0.0584368	0.0333672	0.0453414	0.0308296	0.0435811	0.0522581	0.0309807	0.060647	0.0432574	0.034292	0.034406	0.0372642	0.0456906	0.0332026	0.0378809	0.0227647	0.0366962
GPCho(36:1)	0.0942677	0.0760846	0.0732563	0.0888967	0.110924	0.14273	0.115049	0.0949954	0.12721	0.127931	0.0974069	0.110567	0.0875761	0.1005	0.106501	0.107036	0.100697	0.106741	0.0859302	0.0905923	0.100067	0.0883534	0.125667	0.117097	0.133324	0.117909	0.0833353	0.129307	0.0973097	0.0807691	0.101766	0.0843566	0.109579	0.101314	0.11747	0.0975358	0.074444	0.11081	0.104083	0.130768	0.0961552	0.107666	0.0858471	0.0900495	0.0658023	0.107739	0.095152	0.0795404	0.0943431
GPCho(36:1)	0.196887	0.399583	0.235702	0.196903	0.152383	0.262748	0.314895	0.23038	0.426432	0.164919	0.206975	0.315403	0.415016	0.176062	0.22549	0.145939	0.152017	0.187927	0.255259	0.251048	0.186451	0.41962	0.27507	0.287553	0.202047	0.272348	0.171837	0.224701	0.165508	0.176145	0.262063	0.183579	0.398538	0.206242	0.281334	0.196142	0.230778	0.287553	0.137583	0.334649	0.27316	0.212567	0.188321	0.25111	0.261812	0.190834	0.156185	0.143876	0.230918
GPCho(36:2)	0.545177	0.553757	0.466322	0.541739	0.657642	0.814724	0.793789	0.590361	0.860233	0.746575	0.591181	0.807526	0.519462	0.562771	0.715416	0.555739	0.561368	0.645724	0.483834	0.52381	0.66165	0.591968	0.733481	0.819129	0.75455	0.666724	0.501929	0.815382	0.639929	0.519504	0.55657	0.495415	0.616482	0.59906	0.725275	0.679066	0.505143	0.628446	0.600933	0.96025	0.542444	0.697455	0.521457	0.583677	0.397097	0.67365	0.608962	0.525001	0.686538
GPCho(O-36:2)	0.0108392	0.0107169	0.0123855	0.00939821	0.00816875	0.0155505	0.0171995	0.00961643	0.0148414	0.0102653	0.0108853	0.0189854	0.01019	0.0110793	0.0152918	0.00920844	0.0156062	0.0174713	0.00839302	0.00878039	0.0106178	0.0175859	0.0112299	0.020989	0.0124828	0.00875637	0.0123802	0.0140747	0.00749925	0.0121117	0.00939513	0.0083871	0.0127626	0.00933697	0.0169402	0.0134912	0.0163664	0.0102549	0.00929384	0.0287492	0.00900571	0.00979966	0.00990429	0.0102858	0.00984515	0.0117076	0.0119249	0.00949594	0.0159353
GPCho(36:3)	0.407813	0.377767	0.263644	0.296886	0.338714	0.387483	0.320842	0.381622	0.406052	0.411658	0.295673	0.433225	0.415017	0.271969	0.320445	0.260351	0.311663	0.221571	0.37048	0.279479	0.324886	0.456848	0.434208	0.347199	0.301995	0.307406	0.339115	0.351576	0.245081	0.276766	0.293566	0.248121	0.35161	0.2935	0.31022	0.298439	0.294139	0.372297	0.320635	0.457546	0.314155	0.301755	0.29568	0.261678	0.277538	0.26458	0.312791	0.162137	0.343042
GPCho(O-36:3)	0.0084416	0.00908062	0.00933754	0.00876048	0.00776989	0.0179594	0.0151154	0.00810549	0.0144762	0.0120102	0.00904171	0.0158283	0.0107464	0.0106832	0.0109523	0.00890627	0.0163922	0.0142197	0.00709121	0.00860106	0.00997374	0.0162746	0.00751935	0.0146898	0.00972163	0.00875638	0.0108674	0.0138861	0.00771377	0.00853092	0.00824827	0.00728969	0.00920932	0.00777932	0.00847766	0.00968965	0.0123815	0.00695677	0.00783359	0.0189718	0.00739559	0.00881891	0.00853181	0.00831203	0.00838	0.0112032	0.0100888	0.00697923	0.0140569
GPCho(O-36:3)	0.0127913	0.0101715	0.00902073	0.00780579	0.00896649	0.01773	0.0143138	0.0121194	0.0148414	0.00873214	0.0119076	0.0180834	0.0116737	0.00950138	0.0118447	0.00951063	0.0121481	0.0146167	0.0105859	0.00842172	0.00772485	0.0188973	0.00973129	0.0187758	0.0104561	0.0091459	0.0100434	0.0129432	0.00814279	0.0100087	0.00893639	0.00775539	0.011053	0.00978202	0.0189265	0.00876605	0.0113933	0.0110568	0.00692185	0.0241799	0.00877457	0.00940736	0.00883681	0.00848903	0.00746268	0.00987863	0.0162902	0.00620306	0.0139124
GPCho(36:4)	0.528599	0.657022	0.437368	0.582999	0.48799	0.696244	0.44681	0.828586	0.522699	0.468773	0.559101	0.548939	0.646141	0.462972	0.429162	0.401813	0.602239	0.408158	0.670185	0.48303	0.457547	0.828017	0.58588	0.416564	0.499467	0.496429	0.515381	0.559213	0.454889	0.482943	0.44924	0.348155	0.645399	0.355675	0.685549	0.44393	0.591102	0.662497	0.640283	0.772758	0.471407	0.459942	0.537902	0.451167	0.47919	0.421509	0.790188	0.310493	0.63741
GPCho(36:4)	0.024288	0.0265196	0.0246436	0.0229127	0.0270524	0.0225476	0.0165582	0.0301604	0.0214145	0.0249359	0.0224601	0.0176323	0.0260518	0.0269648	0.01875	0.0197584	0.0190643	0.0256527	0.0195658	0.025708	0.023659	0.0218479	0.0263157	0.0232023	0.0248032	0.0259899	0.0208392	0.021979	0.0319299	0.0205222	0.0295996	0.0210567	0.0181229	0.0328775	0.0248855	0.0206282	0.0136663	0.0208187	0.0253366	0.0194926	0.0369507	0.0279021	0.0176405	0.0226465	0.0218187	0.0233268	0.025793	0.0203735	0.0165132
GPCho(O-36:4)	0.0451399	0.0432116	0.0446383	0.0402732	0.0378123	0.0814001	0.0348014	0.0560439	0.0542367	0.0477186	0.0505668	0.0516981	0.0454209	0.0502856	0.0426289	0.0319006	0.0737323	0.034506	0.0519951	0.0479271	0.0428065	0.0917304	0.0350323	0.0447042	0.0405393	0.0400434	0.0499364	0.0535576	0.0298058	0.0442214	0.0417947	0.0336365	0.0525687	0.0353259	0.0572916	0.0319439	0.0556747	0.0413514	0.0413077	0.0625463	0.0361877	0.0398464	0.0480333	0.0431481	0.0474298	0.0464372	0.0551524	0.0309608	0.0530473
GPCho(36:5)	0.293481	0.461536	0.411517	0.187775	0.243496	0.27528	0.422538	0.453967	0.491814	0.303685	0.298663	0.370694	0.341373	0.298547	0.171625	0.198267	0.26835	0.281871	0.243905	0.148637	0.424831	0.453747	0.363189	0.152514	0.388981	0.358044	0.444906	0.2176	0.165171	0.204787	0.334516	0.201842	0.469461	0.228057	0.546079	0.163475	0.416197	0.536512	0.335224	0.29637	0.268629	0.177955	0.274734	0.24417	0.259329	0.124344	0.451356	0.335483	0.26546
GPCho(36:5)	0.0177553	0.0222069	0.0202027	0.0193025	0.0285885	0.0234653	0.0151153	0.0226869	0.0194061	0.0259812	0.0213758	0.0140242	0.0198529	0.0254701	0.0168637	0.0205729	0.0152918	0.0229256	0.0159738	0.0235374	0.0186245	0.0139796	0.0224779	0.0169029	0.0224274	0.0262042	0.0215499	0.0169965	0.0331101	0.0144901	0.0311138	0.0239604	0.0166771	0.0350811	0.019721	0.0188025	0.00679238	0.0191162	0.0247347	0.0161941	0.0333899	0.0296287	0.0168184	0.0261522	0.015159	0.0211946	0.0236153	0.0224231	0.0116004
GPCho(O-36:5)	0.0271225	0.0255395	0.0169576	0.0239442	0.0195918	0.0359385	0.0120806	0.0233097	0.0205017	0.0232636	0.0329608	0.0228943	0.030451	0.0179968	0.0242723	0.0179664	0.02779	0.0142197	0.0190973	0.0186044	0.0191454	0.0377964	0.0238919	0.0138385	0.0190619	0.0277043	0.0233268	0.0235735	0.0133411	0.0148077	0.0260664	0.0190072	0.0201109	0.0208806	0.0276665	0.01235	0.0197945	0.0245643	0.0163082	0.0322458	0.0201646	0.0212117	0.0217514	0.0214781	0.0151591	0.0172856	0.0412039	0.0161036	0.0276476
GPCho(38:2)	0.0229126	0.0194622	0.0162741	0.0244598	0.0255162	0.0257592	0.0196041	0.0206106	0.02744	0.0261901	0.0206528	0.0233829	0.0232521	0.0162915	0.0249758	0.0200841	0.0226797	0.00799996	0.017223	0.0243265	0.024527	0.0246345	0.0372924	0.0175837	0.0156958	0.024704	0.0211944	0.0303495	0.0144352	0.016871	0.0253088	0.0188361	0.0217371	0.0124766	0.0175357	0.0169765	0.0206792	0.0230319	0.0247345	0.0369078	0.0252508	0.0205638	0.0214224	0.0173878	0.0210937	0.0172853	0.0151051	0.0127084	0.025384
GPCho(38:3)	0.138683	0.123148	0.113605	0.160126	0.147753	0.164766	0.117905	0.133821	0.192847	0.157468	0.16511	0.148071	0.135874	0.112895	0.149215	0.113484	0.154817	0.0566336	0.125987	0.131652	0.152422	0.146842	0.220536	0.137344	0.109669	0.153162	0.133842	0.17143	0.0940985	0.104931	0.147822	0.116058	0.126707	0.102785	0.114117	0.098457	0.129195	0.137344	0.140216	0.217586	0.159776	0.129638	0.135579	0.112979	0.15931	0.114174	0.0951409	0.079812	0.186304
GPCho(38:4)	0.0203339	0.0245592	0.026374	0.0189586	0.0233218	0.0287418	0.02249	0.0260083	0.0188581	0.0192913	0.0208335	0.0218419	0.0266516	0.0160895	0.0168635	0.0207358	0.0200074	0.0156088	0.0181601	0.0144952	0.0201868	0.0185693	0.0279315	0.015711	0.0196555	0.0178465	0.0183514	0.0171955	0.0182401	0.0152836	0.0253088	0.0162741	0.0287143	0.0163638	0.0223031	0.0133249	0.0176934	0.0218402	0.0185147	0.0226173	0.0199096	0.0179739	0.0199425	0.0168036	0.0201045	0.0144423	0.0210414	0.0161033	0.0163686
GPCho(38:4)	0.337658	0.309713	0.210969	0.337658	0.302812	0.47614	0.282456	0.339308	0.395886	0.311281	0.308514	0.277509	0.315925	0.187475	0.323473	0.260348	0.314668	0.140826	0.361785	0.261541	0.2869	0.481779	0.385693	0.198216	0.312788	0.3975	0.229049	0.376664	0.190404	0.314732	0.26206	0.19569	0.415293	0.136938	0.346867	0.241113	0.337586	0.41978	0.394076	0.447683	0.34173	0.286059	0.362615	0.346665	0.308985	0.267806	0.495786	0.213967	0.400079
GPCho(38:4)	0.0191305	0.0241671	0.0188362	0.0167237	0.0150812	0.0214002	0.0110183	0.0195726	0.020684	0.0165736	0.0164962	0.0177826	0.0244519	0.0179963	0.0162347	0.0138933	0.0157632	0.0142193	0.0181601	0.0178147	0.0167147	0.0226674	0.0178318	0.0182648	0.0152999	0.0199894	0.0162192	0.0211816	0.0171147	0.0146486	0.0217754	0.0131996	0.0197492	0.0168271	0.0183303	0.0158146	0.0135674	0.0235427	0.0185147	0.0212285	0.0237248	0.0186214	0.0153383	0.0160246	0.0151589	0.0179961	0.0198535	0.0140536	0.0142011
GPCho(O-38:4)	0.0218812	0.0210306	0.0200319	0.0211935	0.017836	0.0333302	0.0155962	0.0258008	0.0294202	0.0209639	0.024448	0.0275885	0.0222523	0.0220535	0.0251517	0.0151967	0.0265588	0.0201982	0.0194096	0.0247213	0.0189717	0.0322817	0.0196499	0.0281942	0.0198536	0.0178466	0.0251036	0.0269614	0.0157748	0.0248668	0.0195042	0.0205443	0.032152	0.0233286	0.0280637	0.0260008	0.0250988	0.0194566	0.0235308	0.0349653	0.01748	0.0203481	0.0277823	0.0247888	0.0256133	0.0227937	0.0301486	0.0212275	0.0273242
GPCho(38:5)	0.141746	0.147662	0.146918	0.118225	0.149107	0.144595	0.135046	0.148977	0.125569	0.145153	0.122429	0.129319	0.135056	0.123073	0.108788	0.163356	0.0993948	0.108129	0.156599	0.10138	0.119389	0.135159	0.180944	0.107305	0.131278	0.135942	0.121831	0.115616	0.125181	0.11094	0.144522	0.108352	0.194092	0.0953964	0.139339	0.0874797	0.095576	0.152513	0.123162	0.149328	0.144693	0.119151	0.126789	0.120351	0.126578	0.0951239	0.130872	0.0891706	0.137164
GPCho(O-38:5)	0.0315467	0.0259315	0.0321075	0.0406964	0.0385489	0.0548746	0.0315724	0.039954	0.0353452	0.0282807	0.037814	0.0336446	0.0292512	0.0299541	0.0375985	0.0328121	0.0464984	0.0338018	0.0375476	0.0328984	0.0279722	0.0466739	0.0238918	0.0287657	0.0367733	0.0383649	0.0442502	0.0336733	0.0281535	0.0305507	0.0333852	0.0267562	0.0370051	0.0279806	0.0413407	0.0287867	0.0354713	0.0316232	0.0321032	0.0378791	0.0346616	0.0326502	0.0358779	0.0335596	0.0353631	0.0288286	0.0458926	0.0279029	0.0336728
GPCho(38:6)	0.613935	0.561169	0.767112	0.569237	0.463564	0.691891	0.700799	0.708684	0.576426	0.523268	0.496814	0.654173	0.530799	0.531089	0.43213	0.420122	0.470919	0.316186	0.548363	0.431495	0.651228	0.536227	0.57058	0.300081	0.566741	0.609549	0.606123	0.525259	0.40722	0.451411	0.584651	0.213967	0.8731	0.391275	0.701431	0.235079	0.556534	0.556933	0.51793	0.532375	0.490178	0.154879	0.574069	0.311236	0.645921	0.388546	0.655552	0.376663	0.651856
GPCho(38:6)	0.0175833	0.0200504	0.0167865	0.0186148	0.0167423	0.0188766	0.0114735	0.018327	0.0152062	0.0149609	0.0110527	0.0132723	0.0170531	0.0150793	0.0127765	0.0135675	0.0123049	0.0114684	0.0120692	0.0146819	0.014805	0.014799	0.0110424	0.0148597	0.0145432	0.0169893	0.0142646	0.0146401	0.0177847	0.0133787	0.0215231	0.0131996	0.0163155	0.0184489	0.0171385	0.0125067	0.00697929	0.0128286	0.0163078	0.0122598	0.0209271	0.0162625	0.0130362	0.0135693	0.013322	0.0137316	0.0162898	0.0130317	0.0116002
GPCho(O-38:6)	0.00844152	0.00926234	0.0149078	0.0110018	0.00856754	0.0162016	0.00509382	0.00886011	0.00845789	0.00835207	0.0077129	0.00766121	0.0081708	0.009891	0.0109521	0.00754639	0.0106546	0.00591308	0.0082481	0.00788363	0.00900762	0.00820125	0.00880432	0.0049505	0.00808966	0.0119138	0.0120438	0.00760017	0.00771368	0.00619777	0.0114594	0.00682393	0.0115654	0.00844679	0.0101223	0.00527362	0.00567779	0.00867582	0.00874525	0.00772478	0.00808101	0.00744577	0.00944669	0.00831196	0.00864198	0.00693744	0.01267	0.00760009	0.00843536
GPCho(38:7)	0.0156922	0.0173059	0.0125468	0.0160361	0.0220052	0.0197943	0.0113218	0.0197803	0.0168496	0.0205457	0.0161348	0.0117688	0.0162533	0.0156855	0.0130909	0.0156854	0.0138769	0.0160059	0.0139433	0.0184067	0.0158467	0.0114211	0.0172259	0.0133274	0.0158939	0.0199895	0.0172853	0.0165977	0.0227247	0.0165536	0.0215231	0.0186654	0.0137884	0.0189214	0.0147795	0.0183044	0.00494453	0.0141787	0.0213237	0.0127527	0.0232162	0.0218589	0.0145162	0.0208936	0.0107809	0.0162192	0.0208434	0.0150785	0.00952063
GPCho(O-38:7)	0.00718076	0.00658482	0.0131998	0.00671204	0.00717151	0.0108398	0.00921049	0.00753939	0.0103206	0.00816208	0.00754867	0.0116186	0.00708039	0.0116733	0.00685158	0.00890618	0.00728133	0.00685607	0.00652341	0.00698695	0.00852463	0.0065491	0.00696854	0.00602832	0.00953793	0.0111189	0.00954895	0.00741905	0.00560129	0.0060535	0.00916568	0.00466213	0.00887403	0.00777924	0.0106749	0.00438262	0.00485291	0.00820215	0.00565522	0.00630477	0.00716891	0.00492958	0.00731667	0.00496893	0.00564532	0.00774489	0.00898933	0.00527161	0.0068273
GPCho(40:4)	0.00955732	0.0147709	0.0107688	0.0118148	0.00776963	0.0184174	0.0125497	0.0134817	0.0163015	0.0125914	0.0134461	0.0120693	0.0166529	0.00891894	0.0118442	0.0079995	0.013405	0.00647458	0.0136307	0.0128145	0.0106174	0.0231592	0.0158116	0.00835987	0.00880923	0.00914565	0.00872484	0.0121888	0.0096441	0.00926668	0.0123926	0.0117385	0.0155923	0.00911417	0.010122	0.00663114	0.0097129	0.0113785	0.00692162	0.0167145	0.0110858	0.0103974	0.0100564	0.0102855	0.0105132	0.0090544	0.00790957	0.00573717	0.012467
GPCho(O-40:4)	0.00891968	0.00640654	0.00589244	0.00608697	0.00423001	0.00958267	0.00523944	0.00529654	0.00629914	0.00702199	0.00656308	0.00807937	0.00671679	0.00659021	0.00786433	0.00488216	0.00771855	0.00497847	0.00581362	0.00609013	0.00693579	0.00774508	0.00461356	0.00804415	0.00718989	0.00623102	0.00823056	0.00832459	0.00412924	0.00823628	0.00598933	0.0066686	0.00477175	0.00711921	0.00975369	0.00938152	0.00716623	0.00633768	0.00655697	0.0112741	0.00535601	0.00569866	0.00914156	0.00654182	0.00811767	0.00580693	0.00826948	0.00573721	0.0102041
GPCho(40:6)	0.117402	0.140676	0.232638	0.144808	0.1692	0.185073	0.166468	0.222958	0.166818	0.154094	0.126281	0.126639	0.134626	0.149426	0.110196	0.134479	0.152014	0.0630888	0.1399	0.134469	0.271119	0.114915	0.177344	0.0829397	0.142405	0.237784	0.178166	0.131724	0.127215	0.133714	0.25756	0.0812206	0.207116	0.144308	0.174399	0.0679222	0.125839	0.137343	0.165429	0.133861	0.191913	0.111596	0.111041	0.035085	0.0977754	0.119262	0.138341	0.111839	0.152611
GPCho(40:7)	0.0253194	0.0429922	0.0184944	0.0307773	0.0299049	0.032183	0.035519	0.031406	0.0215969	0.0190821	0.0281077	0.0227439	0.0425121	0.017569	0.0222081	0.0286194	0.0244481	0.0166315	0.0255133	0.0137481	0.0196659	0.0249624	0.0253055	0.0160513	0.024209	0.0340489	0.0245705	0.0229752	0.0250848	0.026643	0.034647	0.0119001	0.0339719	0.0208798	0.0328947	0.0134907	0.029113	0.025756	0.0253364	0.0279722	0.0349158	0.0231536	0.0364298	0.0137533	0.0248228	0.0235043	0.0305705	0.0251559	0.0270008
SM(d18:0/16:0)	0.0108393	0.0131021	0.016616	0.0134577	0.0109788	0.0236949	0.0146345	0.0144646	0.0201365	0.0133788	0.0164966	0.0101906	0.0168536	0.0192779	0.0148203	0.0116593	0.016235	0.0189399	0.011916	0.0139355	0.0151526	0.0166025	0.0174283	0.0148601	0.0192599	0.0169898	0.013732	0.0219791	0.0102879	0.0129028	0.0183011	0.0125472	0.0188459	0.0189219	0.0215088	0.0120359	0.0206792	0.0138386	0.0115268	0.0189718	0.0122533	0.0146292	0.0150098	0.0175831	0.0124744	0.0139097	0.01827	0.0143956	0.0165133
SM(d18:0/18:0)	0.00469249	0.0048269	0.00886235	0.00624339	0.00287184	0.00812337	0.00787245	0.00923757	0.00845799	0.00607876	0.00804149	0.00655313	0.00474556	0.00814296	0.00585162	0.00299532	0.00599449	0.00685617	0.00752401	0.00842175	0.00740931	0.00941757	0.0080701	0.00788645	0.00772989	0.011119	0.00806795	0.0105258	0.00370868	0.00376722	0.00711381	0.00466219	0.00837132	0.00450164	0.00757504	0.00663135	0.00763782	0.00820224	0.0056553	0.00756709	0.00422304	0.00531423	0.00701786	0.00707304	0.0051317	0.00661455	0.00880948	0.00451001	0.00911067
SM(d18:0/24:0)	0.0114896	0.0101712	0.0131995	0.0108389	0.0105715	0.0159842	0.0194438	0.0115415	0.0257967	0.014763	0.0127623	0.0137232	0.0135537	0.0124652	0.0126192	0.00905714	0.0171779	0.0128302	0.0126938	0.0137483	0.0146313	0.0234871	0.0154112	0.0125063	0.0147304	0.00836668	0.0108671	0.0138857	0.00771358	0.0101587	0.00962431	0.0130316	0.0183033	0.0129307	0.0155492	0.00768837	0.0166981	0.0117009	0.00801577	0.0187979	0.00877436	0.00881873	0.0130361	0.0124635	0.0119089	0.0107023	0.0111902	0.0106073	0.0199811
SM(d18:1/16:0)	0.315638	0.291903	0.367167	0.274734	0.239686	0.438415	0.386623	0.278938	0.439924	0.318887	0.365022	0.345714	0.385468	0.380326	0.372895	0.25147	0.367064	0.423727	0.269455	0.391243	0.299528	0.410389	0.33752	0.365985	0.429261	0.338571	0.241974	0.395199	0.186201	0.353016	0.28905	0.266751	0.428908	0.329129	0.430687	0.232067	0.394458	0.268988	0.226373	0.444745	0.209712	0.243356	0.286777	0.254931	0.270025	0.287283	0.334386	0.266751	0.380835
SM(d18:1/16:1)	0.0290461	0.0251475	0.0349743	0.0300079	0.0211279	0.0387623	0.053814	0.020611	0.0416787	0.0334497	0.0313431	0.0453977	0.0260518	0.0267513	0.0353532	0.0212246	0.0350014	0.0340365	0.0222208	0.0245241	0.0394331	0.049095	0.030964	0.0375288	0.0385455	0.0352478	0.0377755	0.0379104	0.0155518	0.0298402	0.0265712	0.0164452	0.0512341	0.0201461	0.0482455	0.0206283	0.0667667	0.0398845	0.0263398	0.0582728	0.0191651	0.0175428	0.034222	0.0181673	0.0353631	0.0233268	0.0343365	0.0193488	0.0587037
SM(d18:1/18:0)	0.0621717	0.0454414	0.0675837	0.0645228	0.0446874	0.0921644	0.0888147	0.0716713	0.0785963	0.0707428	0.0844719	0.0660782	0.0529983	0.0713821	0.0732135	0.0357287	0.064574	0.079311	0.0702942	0.0721724	0.0776145	0.0737817	0.0881683	0.0795792	0.0909061	0.0736893	0.0669327	0.114887	0.0475376	0.0666502	0.0785023	0.0636391	0.083873	0.0645905	0.0882055	0.0545786	0.067375	0.0712264	0.0608315	0.111585	0.0543563	0.0630457	0.0858496	0.0691016	0.0574058	0.0640166	0.083724	0.0482122	0.0928752
SM(d18:1/18:3)	0.0220532	0.0210308	0.0212276	0.0251476	0.0126069	0.0292008	0.0184821	0.0218566	0.024336	0.0257722	0.0248095	0.0170311	0.0238522	0.0305948	0.0233085	0.0207359	0.0200075	0.0396702	0.0190973	0.0302489	0.0222703	0.0210283	0.0251038	0.0320042	0.0285648	0.031133	0.0227938	0.0314433	0.0248493	0.0232208	0.0306092	0.02601	0.0217373	0.0402721	0.0252829	0.0256294	0.00872492	0.020308	0.0241329	0.0248743	0.0139044	0.0300604	0.0199427	0.0284892	0.0160069	0.0267028	0.0261891	0.0271385	0.0188252
SM(d18:1/20:0)	0.0607611	0.0521973	0.0577994	0.0598207	0.0385489	0.089737	0.0876136	0.0725231	0.0926073	0.0790339	0.0673343	0.0722655	0.0589053	0.0537022	0.0655244	0.0401703	0.0726926	0.0750075	0.0729989	0.0681245	0.0726287	0.0790651	0.0771935	0.0691677	0.0876143	0.0631263	0.0543104	0.104714	0.0388223	0.0602305	0.0634732	0.0542955	0.0756055	0.0636865	0.0894065	0.0511737	0.069161	0.0732852	0.0591028	0.104628	0.0478108	0.0521543	0.0732653	0.0669708	0.0532271	0.0623156	0.0734943	0.0427462	0.0827546
SM(d18:1/22:0)	0.11436	0.0971431	0.117125	0.110833	0.0805592	0.159315	0.13219	0.120052	0.176581	0.143354	0.126317	0.104743	0.121623	0.123481	0.109871	0.0845138	0.112803	0.130516	0.0269113	0.131266	0.161703	0.152686	0.138927	0.119001	0.133325	0.0983827	0.0833358	0.131352	0.0727697	0.111314	0.119206	0.11222	0.121702	0.0539702	0.136213	0.092257	0.130993	0.115002	0.0851432	0.110144	0.0791114	0.0974556	0.115305	0.125162	0.0922577	0.116013	0.121547	0.105563	0.0955293
SM(d18:1/22:1)	0.0693193	0.0666055	0.0735151	0.0820546	0.0549178	0.114449	0.107308	0.0750783	0.0935108	0.101515	0.0761462	0.0752498	0.0723172	0.0647407	0.0805026	0.0551298	0.0831095	0.0880756	0.0705214	0.0777789	0.0874689	0.0823192	0.0933966	0.0766213	0.09384	0.0751547	0.0615866	0.0981012	0.0478017	0.0791901	0.0802281	0.0636391	0.106875	0.070919	0.108923	0.0541246	0.0691608	0.0815448	0.0566333	0.112638	0.0515105	0.0603893	0.0944739	0.0632419	0.0721308	0.0601286	0.0885016	0.0531276	0.0996887
SM(d18:1/24:0)	0.038664	0.0379472	0.0545291	0.0481023	0.0334161	0.0622164	0.0622232	0.0448321	0.0560453	0.0407011	0.055471	0.047586	0.0456446	0.0465904	0.0501837	0.0337235	0.0534083	0.0574082	0.0433144	0.0428343	0.0487895	0.0653523	0.0438469	0.0382908	0.0571019	0.0400434	0.0449063	0.0501233	0.0265011	0.039923	0.0437715	0.0372677	0.0576954	0.0391763	0.0609706	0.029901	0.0532682	0.0358143	0.0301518	0.0539992	0.0344072	0.036707	0.0484381	0.0353029	0.0407546	0.0359861	0.0549088	0.0389878	0.0652371
SM(d18:1/24:1)	0.206398	0.221104	0.272955	0.237277	0.188751	0.304076	0.332733	0.271384	0.324984	0.146336	0.315084	0.237525	0.265038	0.271583	0.259775	0.172064	0.285804	0.270426	0.238224	0.197862	0.280588	0.346289	0.234951	0.198033	0.312787	0.233968	0.238913	0.264423	0.158439	0.227711	0.275574	0.245013	0.305229	0.258791	0.33549	0.216976	0.290785	0.21654	0.17973	0.290055	0.223305	0.16654	0.25082	0.219734	0.223242	0.187666	0.330781	0.22949	0.378088
GPEtn(36:1)	0.105735	0.194997	0.132381	0.103521	0.0493301	0.0885704	0.0958145	0.0978423	0.10005	0.0803001	0.0860997	0.131232	0.172633	0.0998312	0.0859842	0.0622309	0.0701858	0.0936711	0.0984305	0.0652228	0.0740783	0.14166	0.11042	0.131932	0.0869004	0.108868	0.0722742	0.0895	0.0594702	0.107742	0.0560129	0.0426185	0.146809	0.0820612	0.123315	0.0795706	0.099162	0.118101	0.0956251	0.105546	0.0869253	0.0551519	0.0625746	0.0737497	0.1074	0.0816418	0.0831796	0.0633955	0.0958799
GPEtn(36:2)	0.0740033	0.0640572	0.0511402	0.0747413	0.0578377	0.0848523	0.106154	0.0604948	0.0821961	0.08674	0.0733485	0.125305	0.0673543	0.065886	0.10075	0.0533685	0.0569072	0.0928369	0.0661434	0.0399087	0.062512	0.0588492	0.078803	0.144422	0.0895	0.0802371	0.0556865	0.0972586	0.0367055	0.0888665	0.0285555	0.0326755	0.0825129	0.0615004	0.100772	0.0778318	0.0986534	0.094236	0.0807499	0.0860116	0.0429397	0.0352614	0.047622	0.0478369	0.050202	0.0823562	0.058786	0.0491651	0.123502
GPEtn(38:1)	0.131289	0.217983	0.128218	0.124683	0.0690254	0.147696	0.147352	0.123704	0.130763	0.0848996	0.118403	0.178193	0.16472	0.0799066	0.123527	0.0792739	0.106708	0.118698	0.131444	0.0894998	0.0920702	0.153465	0.156666	0.152229	0.105098	0.126552	0.0946039	0.14381	0.0692895	0.128298	0.0724979	0.0530612	0.187608	0.0870201	0.165012	0.101823	0.188065	0.131728	0.141969	0.178901	0.109239	0.0931594	0.0980373	0.11925	0.146299	0.116706	0.121112	0.0826302	0.151033
GPEtn(O-38:1)	0.215567	0.271396	0.213696	0.175602	0.090319	0.224629	0.246553	0.207758	0.292388	0.216658	0.212751	0.269508	0.190219	0.142023	0.218717	0.123577	0.193521	0.200571	0.204058	0.17964	0.174263	0.435906	0.28099	0.240866	0.237136	0.158298	0.130641	0.285696	0.0979208	0.196178	0.127754	0.121004	0.241484	0.137802	0.308871	0.138638	0.226735	0.205969	0.155677	0.299263	0.117822	0.109261	0.174866	0.184071	0.1711	0.16147	0.215231	0.126832	0.230733
GPEtn(38:2)	0.174694	0.200195	0.118227	0.171969	0.111612	0.242935	0.29202	0.153089	0.164362	0.147207	0.19601	0.247777	0.155075	0.110162	0.206271	0.149513	0.142142	0.214946	0.173618	0.0996806	0.12295	0.154373	0.22793	0.297144	0.193924	0.166779	0.11208	0.245109	0.0903418	0.179594	0.0963005	0.0742192	0.224875	0.101071	0.228143	0.160754	0.237275	0.180153	0.155677	0.291872	0.116963	0.127758	0.127127	0.12625	0.10971	0.203409	0.176806	0.118376	0.263049
GPEtn(38:4)	0.0376053	0.0472621	0.0243181	0.0451336	0.0230844	0.0465073	0.0251726	0.0401914	0.0302111	0.0300674	0.0347362	0.0448748	0.0350795	0.0288124	0.0397454	0.024759	0.0369156	0.0168251	0.0465647	0.0178878	0.0303617	0.0331614	0.0439917	0.0316788	0.0306835	0.0468175	0.0301452	0.0378666	0.0147325	0.0293444	0.0171447	0.0129006	0.0453225	0.0203519	0.0557069	0.0221036	0.0682985	0.0420193	0.0470253	0.0368474	0.0203678	0.018674	0.0316391	0.0270071	0.0340021	0.0337545	0.0468555	0.0255733	0.0582383
GPEtn(O-38:5)	0.0924518	0.0624483	0.0358477	0.0458304	0.0282546	0.104373	0.0359639	0.0557581	0.104919	0.0375928	0.0624483	0.147319	0.0504513	0.0410274	0.0509893	0.0410636	0.0719964	0.0487023	0.0375561	0.0699216	0.0496606	0.125314	0.0683836	0.0472908	0.0644776	0.0483796	0.0426418	0.228397	0.0305828	0.0417405	0.0339637	0.0365008	0.0708678	0.0337739	0.107347	0.0398364	0.131639	0.0503425	0.0413447	0.10695	0.0296093	0.0339038	0.0488649	0.0842499	0.0460737	0.0744981	0.0831796	0.0791956	0.0850341
GPEtn(O-38:6)	0.0423962	0.0370541	0.0216364	0.0268004	0.0245439	0.0586098	0.0268523	0.0318141	0.0436142	0.0375928	0.0362815	0.0789068	0.026594	0.023447	0.032572	0.021661	0.0502679	0.0302977	0.0286952	0.0355596	0.0309577	0.0667769	0.0429911	0.0285084	0.0385592	0.0275214	0.0295536	0.077862	0.0177337	0.0224308	0.0239615	0.0218789	0.0402825	0.0210884	0.0583361	0.0205233	0.0523923	0.0363608	0.029393	0.0567095	0.0127298	0.0225901	0.0280287	0.0373456	0.0215554	0.04038	0.0330013	0.0350076	0.0360623
GPEtn(40:4)	0.0542088	0.0682464	0.0469146	0.0813819	0.0524117	0.095076	0.0400075	0.0678084	0.0496346	0.0494415	0.0869487	0.0527197	0.0477462	0.0396579	0.0669981	0.0481444	0.0653565	0.040191	0.0750731	0.0464447	0.0399069	0.0659639	0.0788013	0.0479499	0.0603763	0.0659201	0.0639795	0.0721615	0.0413501	0.0590922	0.0456847	0.0376124	0.0615502	0.0451856	0.0923166	0.0381902	0.0808551	0.0644658	0.0789985	0.0797319	0.0614215	0.0624184	0.0743949	0.067623	0.0491692	0.0602093	0.106881	0.0478639	0.0729116
GPEtn(42:6)	0.0254583	0.0324176	0.0304038	0.0294824	0.0275095	0.0413616	0.0279714	0.0287805	0.0199824	0.0234722	0.0247182	0.0316055	0.0220484	0.0247876	0.0293708	0.0278563	0.0197257	0.0250007	0.0268214	0.0206784	0.0239203	0.00991304	0.0571306	0.0266055	0.0346205	0.0397878	0.0272289	0.03434	0.0321126	0.0253089	0.0339628	0.0129003	0.0431614	0.0188787	0.0478654	0.0163371	0.029944	0.0239563	0.03814	0.0234351	0.0311685	0.0272457	0.0420275	0.0223248	0.0325361	0.0311382	0.0294103	0.0230753	0.026649
GPSer(36:0)	0.0472262	0.0425313	0.0455082	0.0410267	0.0245435	0.0439206	0.0556173	0.0803224	0.0368489	0.0350839	0.0519918	0.0645293	0.0291907	0.0321655	0.0456653	0.0297154	0.0313174	0.0212847	0.0874387	0.0248828	0.033341	0.0428609	0.0581526	0.0234354	0.0322582	0.0468169	0.0372452	0.0639023	0.0199844	0.0340441	0.0262372	0.0176132	0.0533572	0.0218245	0.047866	0.0178891	0.0329549	0.0536405	0.0445902	0.0615922	0.0311689	0.0206301	0.034684	0.024664	0.0258183	0.0317878	0.049066	0.0237	0.0295533
ChoE(18:0)	0.0279178	0.0473839	0.0310698	0.0241539	0.0156355	0.0419122	0.0561832	0.0255933	0.0495874	0.02968	0.0292604	0.0365053	0.0443229	0.0279216	0.0246976	0.0190179	0.0267526	0.0417983	0.0203159	0.0315718	0.0296811	0.049365	0.0406576	0.0187753	0.0233433	0.0259839	0.0253211	0.0355366	0.0279069	0.0205722	0.0295666	0.0229891	0.0374484	0.041206	0.0318583	0.0168606	0.0145492	0.0262729	0.0188075	0.0237078	0.0136197	0.0214102	0.0183248	0.0306524	0.0193175	0.022929	0.0220183	0.0163322	0.0218688
ChoE(18:1)	0.228504	0.232351	0.231364	0.191188	0.114146	0.323478	0.383032	0.148743	0.33117	0.22265	0.206854	0.284355	0.335421	0.237119	0.175691	0.12374	0.190298	0.276149	0.143846	0.23464	0.179025	0.405221	0.348091	0.146084	0.20261	0.195995	0.169825	0.27748	0.175577	0.174792	0.192133	0.130655	0.258789	0.253851	0.24516	0.115746	0.085297	0.176743	0.156808	0.221646	0.106008	0.169133	0.137446	0.185185	0.167283	0.163908	0.161628	0.112921	0.177449
ChoE(18:2)	0.5991	0.560933	0.706094	0.653905	0.627417	0.98005	1.94778	0.612072	1.05676	0.730121	0.680328	1.07249	0.658676	0.703651	0.793288	0.661808	0.410022	0.952809	0.449074	0.657486	0.626812	0.898711	1.00384	0.632316	0.642412	0.676915	0.575378	0.93531	0.693463	0.522327	0.581162	0.486954	0.751733	0.93171	0.838498	0.435311	0.341695	0.43042	0.56668	0.886403	0.416195	0.557789	0.45176	0.56621	0.398111	0.60713	0.538797	0.532399	0.622489
ChoE(20:4)	0.0443229	0.0635287	0.0532337	0.0724335	0.0259563	0.158274	0.0764429	0.0557695	0.14051	0.0706164	0.0808507	0.0594906	0.0933516	0.0568709	0.0504815	0.0320166	0.0741198	0.0371499	0.0453745	0.0954208	0.0595103	0.138321	0.0843241	0.0302449	0.0789547	0.0858909	0.0456113	0.0819346	0.0279069	0.0759366	0.063418	0.0510077	0.0647364	0.0726174	0.136746	0.0260918	0.0425689	0.0696226	0.0751443	0.0827574	0.015715	0.0689776	0.0862507	0.0814676	0.0417015	0.0466299	0.106613	0.0384696	0.0862334
ChoE(20:5)	0.0149447	0.0352905	0.0454929	0.00795919	0.00643816	0.0419122	0.0338556	0.0184432	0.0581775	0.0228983	0.0132344	0.0180078	0.0225557	0.0315718	0.013599	0.00908935	0.0240205	0.028833	0.00914378	0.0215417	0.0324447	0.0319754	0.0372823	0.00697402	0.041323	0.0492341	0.0223936	0.0170855	0.0126308	0.0113275	0.0220775	0.0166934	0.0303492	0.016795	0.0642294	0.00334272	0.016911	0.0321691	0.0315718	0.0175169	0.006286	0.019431	0.0233118	0.025017	0.0203628	0.0133296	0.0238058	0.0338495	0.0174911
TG(46:0)	0.0805371	0.115878	0.0902117	0.0207499	0.0546955	0.0158993	0.0536831	0.0925683	0.102679	0.069586	0.0157411	0.127598	0.0924964	0.108717	0.0239907	0.0261896	0.0105183	0.017896	0.196354	0.105649	0.086116	0.0893656	0.0714702	0.0661313	0.0352912	0.069494	0.0231241	0.019023	0.0317761	0.024691	0.0556217	0.0104333	0.394208	0.0561824	0.0161855	0.0191359	0.0106647	0.0541904	0.0770785	0.0307536	0.0210075	0.0164737	0.00847703	0.0221991	0.0490435	0.0157225	0.0157619	0.00813129	0.0160388
TG(46:1)	0.138594	0.170543	0.198056	0.0401485	0.100441	0.0288306	0.104906	0.25722	0.212751	0.103603	0.0483104	0.25076	0.174915	0.220905	0.0593068	0.0543173	0.0262058	0.0279212	0.286992	0.134291	0.168421	0.10435	0.140926	0.108072	0.0893816	0.192691	0.0395239	0.0335596	0.0697437	0.0359964	0.106006	0.0306603	0.533008	0.0853905	0.0336296	0.0408642	0.0256867	0.132378	0.136337	0.0810192	0.0745729	0.0413451	0.0315109	0.0401995	0.114539	0.0524633	0.0364299	0.0185966	0.0327322
TG(46:2)	0.064367	0.0761107	0.0909556	0.0310625	0.0856825	0.0223363	0.0399803	0.123665	0.0860706	0.0473948	0.0267217	0.161563	0.102747	0.0974653	0.0303488	0.0408362	0.0169463	0.00981741	0.157917	0.0559213	0.0686315	0.0395678	0.0843225	0.0501917	0.0527064	0.120332	0.0223932	0.0219294	0.048628	0.0170961	0.0556218	0.0198268	0.284302	0.0436862	0.0196595	0.019136	0.0149426	0.0792666	0.0732069	0.050704	0.0468824	0.0342792	0.0258344	0.0240775	0.05882	0.0301872	0.0220181	0.0103489	0.0194365
TG(48:0)	0.106164	0.122015	0.112526	0.036623	0.0605603	0.0353244	0.0764406	0.115639	0.0749966	0.064484	0.030121	0.138614	0.113852	0.108716	0.0439351	0.0445514	0.0207413	0.0325004	0.135246	0.0606635	0.0762325	0.0893651	0.0819666	0.0807852	0.0404604	0.0937606	0.033522	0.0394884	0.0395144	0.0371967	0.0634161	0.0135596	0.218454	0.0599306	0.0161855	0.0237697	0.0169106	0.0683353	0.0751412	0.0547611	0.0490644	0.0164737	0.0226803	0.0212597	0.0662956	0.0301867	0.018443	0.0118273	0.0347561
TG(48:0)	0.19212	0.259782	0.157303	0.037328	0.100439	0.0551604	0.0840911	0.169485	0.164158	0.117738	0.041322	0.261916	0.184474	0.165964	0.0453768	0.0482672	0.0207413	0.0455159	0.332253	0.146566	0.136948	0.237136	0.104847	0.136395	0.0660518	0.103601	0.0579356	0.0394884	0.0644157	0.0642808	0.134824	0.016693	0.486676	0.095797	0.0336291	0.0349072	0.0200629	0.0869821	0.114854	0.0705951	0.0490644	0.0243784	0.0158511	0.0363668	0.0887999	0.032637	0.031871	0.0118273	0.0388073
TG(48:1)	0.0635574	0.0625609	0.0879797	0.0324439	0.0595828	0.0320773	0.0549321	0.0795263	0.0453075	0.0454178	0.0327059	0.103601	0.100184	0.0703017	0.0381683	0.0415788	0.0191021	0.0169846	0.0931198	0.0399379	0.0472104	0.0521988	0.0657008	0.0482999	0.0395988	0.0908084	0.033522	0.0296792	0.0538901	0.02116	0.0523384	0.0154397	0.14438	0.048684	0.0170539	0.0197074	0.0137614	0.0689783	0.068366	0.0498977	0.0589619	0.0223994	0.025834	0.0268948	0.0576692	0.0285532	0.0282738	0.0148223	0.0257832
TG(48:1)	0.521054	0.636266	0.427312	0.198674	0.391324	0.169207	0.4352	0.648637	0.39569	0.364983	0.186699	0.632585	0.58741	0.604847	0.2108	0.233104	0.1184	0.130198	0.428847	0.383928	0.412579	0.492136	0.458411	0.381419	0.237262	0.467971	0.215417	0.169116	0.252697	0.162041	0.364068	0.0733524	0.654921	0.377955	0.105551	0.142182	0.0857817	0.390995	0.474561	0.30817	0.251252	0.0980487	0.0904139	0.119414	0.383659	0.161897	0.104605	0.0663213	0.175985
TG(48:2)	0.366327	0.415528	0.47335	0.201481	0.359607	0.146124	0.320415	0.428664	0.243415	0.220217	0.187759	0.567735	0.527837	0.400098	0.174822	0.210418	0.108982	0.0761093	0.443185	0.196868	0.275964	0.266849	0.354215	0.249094	0.186699	0.472879	0.150548	0.14166	0.201634	0.105773	0.271405	0.067725	0.529741	0.250774	0.0743731	0.105029	0.0775427	0.353763	0.329369	0.257993	0.264688	0.103602	0.114927	0.0867351	0.309963	0.142791	0.104605	0.0534177	0.144481
TG(48:3)	0.105309	0.054972	0.11327	0.0785134	0.146823	0.040807	0.114506	0.14473	0.071306	0.0644842	0.0447931	0.227535	0.101892	0.0862117	0.0570992	0.0923813	0.0384754	0.0233641	0.138373	0.0371489	0.0747123	0.0444309	0.143413	0.0701274	0.0780039	0.128204	0.0594884	0.050367	0.0818259	0.0335942	0.08707	0.0300207	0.230891	0.0586811	0.0389449	0.0354995	0.0305871	0.0966269	0.106671	0.100127	0.0916147	0.0565969	0.0463824	0.0344508	0.0841237	0.0558112	0.0548376	0.02539	0.0477818
TG(49:1)	0.0942038	0.0693333	0.0406625	0.0401477	0.0478633	0.0374943	0.0599303	0.0746345	0.0487299	0.0414646	0.0361521	0.0532776	0.0754102	0.0606632	0.0468182	0.0342005	0.0212876	0.0306546	0.0784469	0.051177	0.0500872	0.0299317	0.0680077	0.0927753	0.0344289	0.081951	0.0425664	0.0375117	0.0433835	0.0353952	0.0490642	0.0104333	0.183054	0.0649644	0.015317	0.0307619	0.0165168	0.0612621	0.0943945	0.0523137	0.0403336	0.0155046	0.0170876	0.0165639	0.0674456	0.0310033	0.0202304	0.0125665	0.0413589
TG(50:0)	0.258995	0.216326	0.185239	0.089916	0.144714	0.11818	0.195631	0.2387	0.137742	0.151446	0.0931716	0.411913	0.206425	0.170543	0.10671	0.089175	0.0602898	0.0974627	0.236431	0.154749	0.142052	0.233037	0.165806	0.165064	0.114029	0.13706	0.128516	0.114475	0.13938	0.104324	0.168446	0.0358442	0.333301	0.14338	0.0614589	0.0576463	0.0442999	0.119428	0.183133	0.142862	0.127618	0.0555661	0.0353639	0.0507839	0.149587	0.0703473	0.0632442	0.0330782	0.10899
TG(50:0)	0.158666	0.173977	0.0969054	0.0255345	0.0674594	0.0374939	0.0624292	0.111626	0.101755	0.0664997	0.0327054	0.245711	0.118123	0.0974627	0.0410511	0.0356569	0.0185554	0.029743	0.210113	0.11383	0.086875	0.191189	0.0831422	0.136395	0.0624626	0.0685603	0.0395229	0.0355349	0.0395139	0.0420469	0.0689829	0.0166929	0.39157	0.0474337	0.0240014	0.0266711	0.0192722	0.0593326	0.0933708	0.0749368	0.0414246	0.0214097	0.0133778	0.0193813	0.0766472	0.0261307	0.0175493	0.0125665	0.042964
TG(50:1)	0.291406	0.256004	0.264933	0.165869	0.201699	0.165562	0.273852	0.276975	0.135896	0.129698	0.178212	0.359198	0.331533	0.193435	0.148729	0.133604	0.102927	0.101555	0.208393	0.111784	0.148006	0.225309	0.193487	0.179822	0.124458	0.253544	0.162481	0.147097	0.19729	0.111569	0.185415	0.0391057	0.345016	0.17638	0.064226	0.0755263	0.0585938	0.218461	0.230062	0.209886	0.214974	0.0836864	0.0890255	0.0644697	0.206405	0.121575	0.0895563	0.0614331	0.131306
TG(50:1)	1.11666	1.09859	0.959554	0.472768	0.720452	0.663858	0.948213	1.18456	0.621149	0.714141	0.518052	1.80915	0.948544	0.879872	0.536055	0.500012	0.304867	0.52891	1.19333	0.825192	0.4946	1.25173	0.860743	0.561083	0.569344	0.951644	0.676435	0.586063	0.770198	0.405319	0.82809	0.198553	1.61425	0.736085	0.294352	0.3291	0.236682	0.423608	0.861646	0.669707	0.669604	0.272494	0.221559	0.262522	0.384778	0.394828	0.290556	0.162109	0.460347
TG(50:2)	0.132859	0.0549712	0.111039	0.0921967	0.159473	0.0975265	0.158505	0.140717	0.0444513	0.0788433	0.104549	0.232584	0.106163	0.0872332	0.0973814	0.107607	0.0554799	0.0436562	0.0791454	0.0455155	0.0655886	0.0593952	0.125995	0.0681284	0.0678448	0.12033	0.0921142	0.0809009	0.117665	0.0558627	0.0847959	0.0281024	0.158296	0.0866887	0.0318569	0.0450921	0.0309963	0.0934119	0.12406	0.121841	0.126417	0.036297	0.0605706	0.0421147	0.10167	0.0600618	0.0539066	0.0376983	0.0713306
TG(50:2)	0.81087	1.30248	1.22961	0.979929	0.88795	0.846075	1.37867	0.574354	0.63062	0.691843	0.815456	1.657	1.41168	0.861646	0.751708	0.554465	0.463581	0.520407	0.675661	0.616233	0.78934	1.26535	0.981399	0.44295	0.624596	1.51891	0.567639	0.7622	0.992386	0.603072	0.783723	0.245732	1.57043	0.925616	0.31254	0.416762	0.295133	1.07425	0.697019	0.886448	0.800966	0.389517	0.478603	0.346633	0.331421	0.57365	0.528676	0.299451	0.299445
TG(50:2)	0.0685756	0.0549712	0.0574811	0.0345163	0.0344502	0.0234184	0.0449345	0.0539066	0.0260069	0.021929	0.0370135	0.101959	0.033351	0.0279204	0.0338803	0.040092	0.0180171	0.0197185	0.0609791	0.0224525	0.0282982	0.0430406	0.0306307	0.0345605	0.0309823	0.0366313	0.0238544	0.0277414	0.0356448	0.022925	0.0349145	0.0098196	0.0833892	0.0191943	0.013608	0.016291	0.0106645	0.0429717	0.0288318	0.0697254	0.042516	0.0125975	0.011523	0.0119566	0.0501922	0.0301864	0.0346057	0.0170867	0.030746
TG(50:3)	0.541771	0.296294	0.516347	0.491493	0.72938	0.452644	0.823187	0.810157	0.229786	0.360522	0.485462	0.79338	0.54878	0.447877	0.443617	0.521395	0.30387	0.233495	0.501518	0.233495	0.353886	0.32803	0.632899	0.356597	0.348041	0.59466	0.513586	0.393237	0.570586	0.256169	0.435901	0.138526	0.820959	0.422037	0.146494	0.211715	0.17724	0.403833	0.564703	0.593617	0.683053	0.188899	0.2934	0.165133	0.49466	0.304115	0.3079	0.184861	0.371519
TG(50:4)	0.214836	0.0540226	0.143154	0.143753	0.278092	0.0987417	0.293852	0.212137	0.0749956	0.0949019	0.135835	0.376517	0.0976206	0.099509	0.120026	0.209432	0.0669037	0.0625601	0.165396	0.0664293	0.116534	0.0706339	0.238031	0.134159	0.122562	0.145917	0.112625	0.105776	0.198738	0.0500353	0.098798	0.0470115	0.185925	0.133755	0.0514809	0.0633936	0.0503641	0.131659	0.150657	0.181736	0.206913	0.0545363	0.0848615	0.0556718	0.108748	0.0937145	0.0895566	0.0566235	0.083838
TG(51:1)	0.0737005	0.0362185	0.0454903	0.0262253	0.0334919	0.0299121	0.0611793	0.052976	0.0251847	0.0238664	0.0335669	0.10442	0.0466972	0.0380778	0.0331737	0.0298303	0.0153388	0.0188071	0.0539914	0.0315701	0.0345161	0.0272077	0.0463086	0.0747894	0.0275653	0.0411028	0.0312846	0.0394876	0.0304857	0.029991	0.0317049	0.00797843	0.0919397	0.0314043	0.0144585	0.0278316	0.016123	0.0393227	0.0578165	0.0539381	0.0349142	0.0184413	0.0164691	0.0156355	0.0519171	0.0285526	0.0202302	0.0096097	0.0327309
TG(51:2)	0.160578	0.0954163	0.118185	0.12589	0.109925	0.10846	0.192881	0.153771	0.0530076	0.045417	0.105496	0.236623	0.137638	0.0761071	0.114483	0.0899762	0.0614921	0.0693321	0.102203	0.0625595	0.0724303	0.0668871	0.134703	0.164244	0.0865346	0.126235	0.125762	0.142747	0.12635	0.0739924	0.0963952	0.0306595	0.212713	0.143379	0.0309707	0.0761647	0.0555617	0.114392	0.180844	0.150637	0.155237	0.0565958	0.0640403	0.0459467	0.129983	0.0928152	0.0511156	0.0330781	0.104798
TG(51:3)	0.0959117	0.0306542	0.051119	0.0800327	0.0909498	0.0652853	0.122754	0.0795242	0.0251848	0.0454171	0.0714323	0.15881	0.0498659	0.0483307	0.074838	0.0699411	0.0441631	0.0445856	0.0595812	0.0380779	0.0359176	0.0238033	0.0784336	0.0781201	0.0439132	0.0648356	0.075705	0.0736986	0.0885365	0.0414341	0.0556204	0.0204528	0.0973812	0.071339	0.021396	0.0426751	0.0305862	0.0599754	0.105646	0.0862282	0.090476	0.030315	0.0360073	0.0306509	0.0645697	0.0507947	0.0446338	0.0323081	0.0686544
TG(52:0)	0.111288	0.06546	0.0664063	0.0408518	0.0507833	0.0331588	0.0905899	0.102596	0.0530071	0.0523824	0.0456712	0.190173	0.0702827	0.0625589	0.0482715	0.0363849	0.0207408	0.0352885	0.123519	0.0625589	0.0522437	0.110343	0.0937342	0.0987704	0.0606676	0.0510566	0.0524999	0.064482	0.0356443	0.034794	0.0656414	0.0173193	0.173952	0.047433	0.0187906	0.0343141	0.0240789	0.0561167	0.0821166	0.0844903	0.047972	0.0263569	0.0189421	0.0250159	0.062844	0.0408039	0.0291666	0.0163318	0.0372868
TG(52:1)	0.658659	0.334965	0.449417	0.452229	0.46307	0.459289	0.817942	0.683408	0.258179	0.301571	0.488589	0.881149	0.450197	0.325173	0.443579	0.383649	0.258677	0.392382	0.371707	0.24845	0.32822	0.421955	0.540866	0.441509	0.351931	0.390804	0.460526	0.522372	0.487913	0.334765	0.399774	0.149545	0.710149	0.43332	0.181062	0.254548	0.205195	0.393277	0.48972	0.606753	0.532903	0.303936	0.256676	0.230008	0.403046	0.365018	0.305372	0.163057	0.347053
TG(52:1)	0.531154	0.386726	0.358579	0.175282	0.240623	0.188949	0.444602	0.503616	0.285742	0.242117	0.214279	1.01507	0.353388	0.291258	0.252411	0.187732	0.105618	0.181989	0.52667	0.332167	0.253092	0.488904	0.361871	0.466838	0.250098	0.270501	0.233593	0.274804	0.192947	0.191527	0.306427	0.0902341	1.03023	0.230774	0.119197	0.183384	0.116395	0.294061	0.385327	0.423044	0.216318	0.124703	0.0966596	0.100437	0.343178	0.194076	0.12266	0.0680134	0.198675
TG(52:2)	0.552188	0.128151	0.273071	0.41115	0.555563	0.429383	0.849316	0.546269	0.139587	0.3096	0.426448	0.851841	0.223247	0.223194	0.396722	0.404996	0.249628	0.385327	0.302711	0.165964	0.256211	0.202255	0.475424	0.338856	0.357117	0.272924	0.42964	0.467835	0.52751	0.261033	0.321207	0.135377	0.417508	0.310776	0.151612	0.222194	0.194832	0.266964	0.41548	0.531257	0.478681	0.213754	0.236745	0.208776	0.283936	0.277077	0.312016	0.200565	0.321371
TG(52:2)	3.61434	1.80216	1.97436	2.54773	2.24639	2.16239	4.22898	3.76278	1.24194	1.40308	2.16092	5.02168	2.12197	1.72763	2.49599	2.00853	1.39313	2.04705	1.82808	1.57888	1.43669	2.24438	2.53568	2.53859	1.67092	1.71688	2.56872	2.45829	2.79051	1.63284	2.09349	0.843236	3.38218	1.06018	0.873206	1.37257	0.947093	1.80401	2.5418	3.31013	2.80382	1.39239	1.15948	1.22801	2.2262	1.8651	1.49361	0.62308	2.05038
TG(52:3)	2.66428	0.686427	1.31045	2.23991	2.97761	2.34174	4.82761	2.75752	0.624852	0.700659	2.16092	4.30809	1.11665	1.08035	1.88765	1.99156	1.43841	2.12293	1.39858	0.627671	1.32716	0.564331	2.35138	1.94453	1.81123	1.48312	2.00693	2.43813	2.39259	1.09736	1.56966	0.680306	2.07858	1.52565	0.668129	1.13657	0.271101	1.37018	0.562777	2.82371	2.31504	1.0147	1.05857	0.925508	1.57	1.4198	0.656672	1.10896	1.39083
TG(52:4)	1.02433	0.149634	0.443885	0.775787	0.831597	0.812741	1.87234	1.05943	0.275214	0.64686	0.645904	1.99354	0.279723	0.412403	0.751701	1.17864	0.417291	0.654959	0.538862	0.259782	0.508573	0.296409	0.857809	0.451089	0.64007	0.477677	0.603344	1.09027	1.01307	0.410578	0.586875	0.314303	0.516832	0.622644	0.308541	0.411465	0.295983	0.44627	0.703222	1.02564	0.813174	0.374328	0.445774	0.386999	0.47428	0.532953	0.607968	0.438057	0.612918
TG(52:5)	0.393335	0.0702996	0.142321	0.237497	0.502935	0.171636	0.646842	0.36689	0.0851447	0.149271	0.2641	0.837226	0.0745545	0.111784	0.223237	0.419672	0.122437	0.161386	0.185174	0.0578163	0.158214	0.129099	0.402266	0.18884	0.225593	0.14198	0.225515	0.225084	0.353397	0.0843524	0.181655	0.0965654	0.168733	0.18188	0.0841028	0.114317	0.11053	0.145328	0.194579	0.302231	0.350766	0.0958247	0.151424	0.110979	0.128696	0.175975	0.206525	0.134616	0.169398
TG(54:2)	0.150064	0.0559182	0.069381	0.154811	0.139443	0.132757	0.270775	0.188566	0.0759156	0.0644812	0.14851	0.312404	0.0916391	0.0549697	0.149598	0.122032	0.0723141	0.102576	0.131337	0.0625581	0.0529622	0.0736291	0.125992	0.118507	0.124457	0.083916	0.159728	0.138396	0.161094	0.102151	0.12041	0.0503374	0.176561	0.0918895	0.0669907	0.0774412	0.0736656	0.0908395	0.122013	0.206679	0.200195	0.115817	0.090413	0.0724442	0.113896	0.120676	0.122659	0.0416006	0.0982104
TG(54:2)	0.317107	0.13122	0.175168	0.177153	0.192262	0.218855	0.401648	0.396851	0.142477	0.151446	0.22676	0.647191	0.189253	0.126105	0.257726	0.173954	0.123782	0.178555	0.388274	0.181989	0.12504	0.218854	0.261695	0.39001	0.244263	0.160759	0.288843	0.268112	0.19005	0.168416	0.219005	0.100082	0.51355	0.154378	0.104574	0.157448	0.14894	0.177535	0.278667	0.420105	0.270062	0.212511	0.140552	0.121521	0.233567	0.217169	0.180709	0.0773327	0.180377
TG(54:3)	0.122394	0.0242746	0.0406612	0.137799	0.158419	0.099953	0.227697	0.159383	0.0410553	0.0624647	0.120665	0.261916	0.0451122	0.0371475	0.116815	0.147951	0.0644976	0.0821155	0.104299	0.0399365	0.044376	0.0472343	0.114795	0.0727902	0.118769	0.0501436	0.124111	0.12426	0.142273	0.0642788	0.0813848	0.039757	0.11526	0.0687876	0.0605348	0.0538133	0.070273	0.053544	0.102576	0.154524	0.166044	0.0947123	0.0737558	0.0605578	0.0605431	0.0892189	0.107612	0.0502426	0.0832392
TG(54:3)	0.704315	0.238378	0.306577	0.69451	0.655374	0.603811	0.933801	0.809201	0.271807	0.289525	0.714289	1.47547	0.45882	0.232351	0.682445	0.521228	0.334118	0.48796	0.613406	0.298812	0.243735	0.362382	0.578926	0.477998	0.556853	0.355882	0.866448	0.693855	0.721939	0.435743	0.469634	0.251504	0.640897	0.374571	0.309874	0.342971	0.364834	0.435355	0.619882	0.839925	0.925866	0.592738	0.424429	0.323566	0.52539	0.549615	0.583603	0.202651	0.517553
TG(54:4)	0.0635541	0.0133874	0.028364	0.0633059	0.123629	0.0551589	0.166754	0.0955732	0.0227183	0.039487	0.0732594	0.144122	0.0233153	0.018807	0.0578316	0.117224	0.0367685	0.0473814	0.0581824	0.0206296	0.0324429	0.0265264	0.0890249	0.0438859	0.0696365	0.0303699	0.0563803	0.0624648	0.0858497	0.0282205	0.0414237	0.0274625	0.0446542	0.0399781	0.0345138	0.0319454	0.0369354	0.0381294	0.04833	0.0740662	0.0963929	0.0453808	0.0405114	0.0430719	0.0287707	0.0499603	0.0689369	0.0299975	0.0472446
TG(54:4)	0.598607	0.102576	0.211789	0.735145	0.831806	0.520823	1.08467	0.702942	0.172418	0.270789	0.614689	1.1768	0.186385	0.169398	0.544707	0.556111	0.300825	0.378332	0.488018	0.173977	0.212709	0.204099	0.494038	0.386296	0.526854	0.242643	0.617958	0.562178	0.69541	0.318572	0.373499	0.213271	0.505589	0.243082	0.263157	0.256462	0.286164	0.270815	0.481147	0.793756	0.817976	0.429377	0.344931	0.276795	0.293495	0.445172	0.530329	0.227678	0.373827
TG(54:5)	0.352084	0.0578155	0.131502	0.2874	0.557312	0.247401	0.782034	0.439102	0.105445	0.166683	0.319518	0.793364	0.0796792	0.0995068	0.271546	0.476676	0.148986	0.183133	0.281665	0.0913227	0.131845	0.106597	0.363403	0.211744	0.333779	0.133123	0.276501	0.25339	0.403289	0.120263	0.181655	0.126719	0.235675	0.183255	0.154884	0.139324	0.170704	0.147486	0.228917	0.348843	0.432617	0.198841	0.187351	0.154202	0.136138	0.247035	0.274505	0.129876	0.214149
TG(54:6)	0.181606	0.0224521	0.100624	0.130143	0.385557	0.108458	0.431439	0.239935	0.0461617	0.0861998	0.156996	0.46662	0.049865	0.0702985	0.122636	0.318243	0.0783269	0.0923458	0.132119	0.039007	0.0815523	0.090113	0.235247	0.0987704	0.177151	0.0770274	0.155138	0.117735	0.242978	0.0444962	0.0951922	0.0705367	0.111373	0.090589	0.0697579	0.0799957	0.0843277	0.074121	0.105645	0.177848	0.227067	0.0731755	0.089719	0.0825141	0.0697453	0.117081	0.148743	0.0985156	0.104199
TG(56:5)	0.0482796	0.0107099	0.0560423	0.0565568	0.0704477	0.0430126	0.212312	0.0985811	0.0194301	0.0267716	0.0579768	0.0978553	0.020271	0.0362171	0.0497405	0.0460349	0.0384726	0.0417952	0.0819385	0.0133874	0.044375	0.0444279	0.0986184	0.0175869	0.0642529	0.0357353	0.130352	0.0483802	0.0565186	0.0182485	0.0425141	0.0179455	0.0593007	0.0338531	0.0821495	0.0220275	0.0464644	0.0315704	0.0568656	0.0605093	0.0791106	0.033282	0.029617	0.0373227	0.0303698	0.0277346	0.129681	0.0697051	0.0515255
TG(56:5)	0.0933471	0.0279194	0.0619414	0.101319	0.0774299	0.121821	0.132375	0.121656	0.0385391	0.0424512	0.10265	0.128516	0.0411512	0.0362174	0.0888289	0.0550711	0.0771241	0.0362174	0.109447	0.0390065	0.0479269	0.0818705	0.1347	0.0395005	0.103598	0.0528805	0.106061	0.148183	0.100857	0.0389959	0.0645265	0.0463436	0.0888289	0.0611779	0.0496712	0.0372739	0.0697884	0.0683331	0.108713	0.181736	0.131217	0.0815806	0.0654265	0.0634895	0.078372	0.0651605	0.108614	0.050242	0.0750767
TG(56:6)	0.194988	0.0693295	0.168955	0.183703	0.232367	0.218855	0.328877	0.239935	0.0759147	0.114472	0.240763	0.357848	0.0916386	0.111782	0.155687	0.171264	0.148246	0.129173	0.187754	0.0712651	0.115004	0.15844	0.303686	0.0941071	0.206854	0.11836	0.228544	0.191017	0.264036	0.0759339	0.155235	0.0853092	0.204103	0.12275	0.119196	0.0768023	0.139462	0.118708	0.17741	0.287977	0.264688	0.119148	0.107161	0.137334	0.163743	0.093712	0.213259	0.0688587	0.145139
TG(56:7)	0.279723	0.0800683	0.489852	0.223001	0.24306	0.171635	0.794774	0.491847	0.106367	0.135134	0.244263	0.47727	0.0907843	0.298812	0.176561	0.165884	0.145286	0.222049	0.260318	0.105644	0.284281	0.189345	0.482807	0.12596	0.294884	0.180579	0.571111	0.250714	0.36587	0.0778765	0.178052	0.0649081	0.475333	0.280006	0.200695	0.107172	0.169398	0.201754	0.316779	0.256924	0.426049	0.0947112	0.129681	0.154202	0.328138	0.145808	0.274505	0.25062	0.197943
TG(56:8)	0.176827	0.0334285	0.261882	0.159915	0.233546	0.112102	0.572885	0.306607	0.0581722	0.114472	0.172908	0.370185	0.0380082	0.159097	0.114483	0.166781	0.104945	0.137358	0.181735	0.0530722	0.161616	0.0901126	0.318998	0.0701251	0.203671	0.0888359	0.417311	0.144921	0.231639	0.0444955	0.112003	0.0430179	0.225151	0.159878	0.12992	0.067862	0.114795	0.119428	0.214037	0.160355	0.260657	0.0504275	0.0911068	0.0909468	0.133307	0.0883195	0.239935	0.21725	0.153703
TG(56:9)	0.0419434	0.0107099	0.0532283	0.0310609	0.0625123	0.0201713	0.136501	0.0679871	0.0194303	0.0190227	0.033566	0.0921125	0.0104343	0.0279195	0.0232932	0.0430632	0.0251117	0.0215407	0.0453703	0.0169844	0.042261	0.0285689	0.0925549	0.0181805	0.0491868	0.0233521	0.0789849	0.02096	0.0459935	0.0101737	0.0220769	0.012306	0.0345859	0.0314037	0.0380573	0.0128775	0.025685	0.0280244	0.0352879	0.0260273	0.0578461	0.0135666	0.0226793	0.03065	0.0266374	0.0165228	0.0670381	0.0502422	0.0282636
TG(58:8)	0.0498637	0.0251855	0.0835139	0.0522415	0.0576241	0.0562708	0.233851	0.109617	0.0268277	0.0306461	0.062459	0.0978553	0.0271388	0.0445842	0.0504759	0.0490071	0.0407478	0.0530716	0.0819384	0.0260967	0.0472071	0.0507771	0.0913761	0.0284267	0.0836866	0.0446788	0.176251	0.0584304	0.0751088	0.0223355	0.0523359	0.0191987	0.0942703	0.0486812	0.0831243	0.0325368	0.0559942	0.0417526	0.0821131	0.0629744	0.0975909	0.0423517	0.0476919	0.0449871	0.0501896	0.0457927	0.144729	0.074789	0.06116
[truncated: 26 more columns]
